# Supplementary material
Source: Springer Nature journal article supplement (https://www.springermedizin.de/resource/supplementary/13049_2010_187_MOESM1_ESM.pdf/9666064)

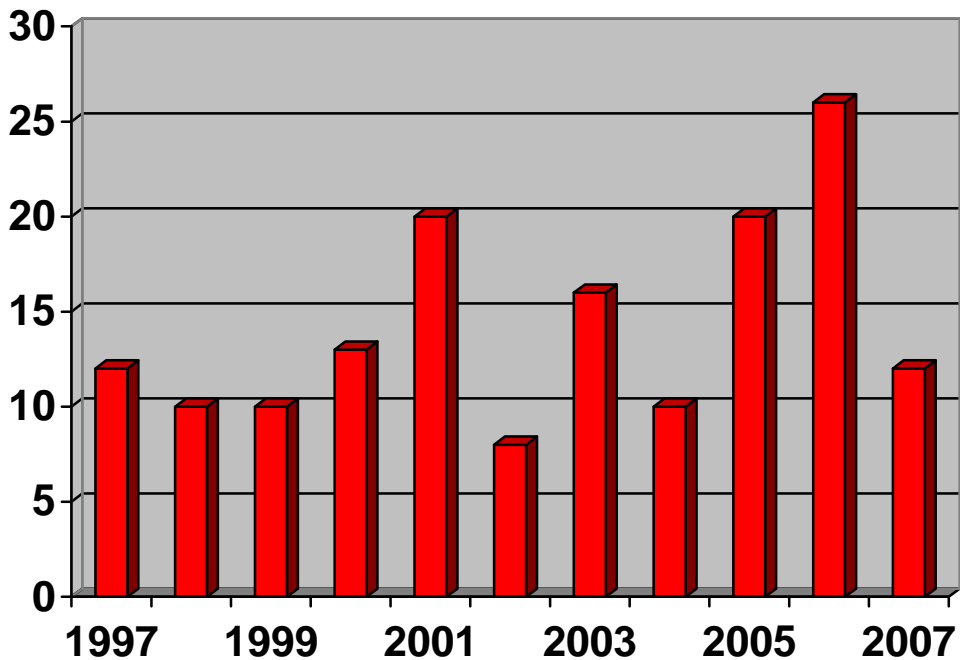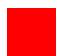

Deer Versus Vehicle Patients

Supplement: MOESM1 [file 9666064]
